# Supplementary material
Source: publisher figshare collection journal article supplement (https://tandf.figshare.com/articles/dataset/_/22187758)
Supplement: Supplementary file 1 [file 1]

| **Table 1 Metals contributed by different types of waste and their possible sources, highlighting major issues and solutions** | | | | | | |
| --- | --- | --- | --- | --- | --- | --- |
| **S. No** | **Solid Waste** | **Metals** | **Metals sources** | **Major issues** | **Possible solutions** | **References** |
| 1 | Municipal | Cd, Cr, Cu, Hg, Ni, Pb, and Zn | Municipal Wastewater Treatment Plant | Environmental hazard and health risk | Knowledge on their total concentrations and chemical forms | [1] |
| 2 | Clinical | Hg, Pb, As, Cd | Pharmaceutical, chemical, and radioactive waste | Environmental pollution by landfill leachate and gas | Appropriate segregation and sorting of clinical waste at the generation site | [2] |
| 3 | Industrial | Pb | Sheets for buildings, ammunition | Environment deterioration, effects on humans, birds, animals | Increased collection and recycling | [3] |
| Hg | Chlor-alkali industry, measuring devices, and control equipment |
| Cd | Plating and coating, silver-cadmium alloys, PVC stabilizer |
| Cr | Stainless steel, plating, leather tanning |
| 4 | Residential/Domestic | Cd | Batteries and accumulators | No proper disposal often leads to tremendous environmental harm, recovery of metals not always done | Segregation and recovery of metals for future uses | [4] |
| Ni, | Nickel-chrome alloys in household heating appliances |
| Hg | Fluorescent lamps and thermometers |
| Zn | fluorescent lamps, cosmetics, medicines |
| Pb | Stibium-lead batteries |
| 5 | Agriculture | As | Pesticide residues, animal diets | Crop failure or diminished yields | Organic residue applications, application of animal manure | [5] |
| Cu | Hog rations | Plant growth inhibited; ruminants susceptible |
| Pb, Cd, Cr | Commercial fertilizers | accumulation in soils, plants and food chain and environment contamination | Proper identification of fertilizers components and after effects | [6] |

| **Table 2 Microbial mediated metal remediation processes employing various bacteria, fungi, and algae in different mediums.** | | | | | | | |
| --- | --- | --- | --- | --- | --- | --- | --- |
| **S. No** | **Microorganisms** | **Types** | **Heavy Metals** | **Contaminated**  **sources** | **Mechanism** | **Reduction** | **References** |
| 1 | Sporosarcina pasteurii  Strain: DSM 33 | Bacteria | Pb  Zn  Cd | Soil | Microbially-induced carbonate precipitation | 33.3-85.9%  21.4 - 66.0%  13.6 - 29.9% | [7] |
| 2 | *Chlorella vulgaris* | Microalgae | Pb | Water | Biosorption | ~90% | [8] |
| 3 | *Sphingomonas desiccabilis*and, *Bacillus idriensis* | Bacteria | As | Soil | Biovolatilization | 2.2%–4.5% | [9] |
| 4 | *Acinetobacter calcium acetate, Pseudomonas putida and Salfobacillus* | Bacteria | Pb, Cu, Cr, Cd, Ni, V | Seawater | Physical precipitation, bio- deposition of heavy metals | 72.60% | [10] |
| 5 | *Penicillium citrinum* | Fungus | Cu  Mn  Zn | Coffee wastewater | Adsorption | 44%  62%  48% | [11] |
| 6 | *Mucor circinelloides, Actinomucor sp,*  *Mortierella sp* | Fungus | Zn  Pb  Mn | Mine tailings | Adsorption | 86.89%,  95.46%,  92.78% | [12] |
| 7 | *Fusarium oxysporum* | Fungus | Pb2+ Cd2+ | Water | Metal carbonate formation | NA | [13] |
| 8 | Brevundimonas species IITISM22 | Bacteria | Hg | Soil | Biosorption | 666.6 mg/g | [14] |
| 9 | *Alkalibacterium* sp. TRTYP6 | Bacteria | Cu | Municipal solid from waste landfill site | Bioleaching | 52% | [15] |
| 10 | *Acidithiobacilluscaldus, Leptospirillum ferriphilum, Sulfobacillus* spp *Ferroplasma spp* | Bacteria | Co  Ni  Li | Waste lithium-ion batteries (LIBs) | Bioleaching | 99.9%  99.7%  84% | [16] |
| 11 | *Acidithiobacillus ferrooxidans, Ferroplasma acidiphilum,* and *Leptospirillum ferriphilum* | Bacteria | Cu | Waste printed circuit boards (WPCBs) | Bioleaching | 76.2% | [17] |
| 12 | *Acidithiobacillus ferrooxidans* | Bacteria | Cu | Salobo mine waste | Bioleaching | NA | [18] |
| 13 | *Chromobacterium violaceum* | Bacteria | Au  Cu | Waste mobile phone printed circuit boards (PCBs) | Bioleaching | 11%  11.4% | [19] |
| 14 | *Acidithiobacilli* | Bacteria | Cd, Cu, Zn | Fly ash (originating from municipal solid waste incineration | Bioleaching | Mobilization >80% | [20] |
| 15 | Nanochloropsis, Pavlova lutheri, Tetraselmischuii and Chaetoceros muelleri | Microalgae | Al, Fe | Waste streams | Adsorption | >95% | [21] |
| 16 | Nostoc muscorum  Anabaena variabilis | Cyanobacteria | Pb | Aqueous solution | NA | 97.8%  71.4% | [22] |
| 17 | Nostoc commune, Oscillatoria limosa and Chlorella vulgaris | Microalgae | Cu,  Pb | Wastewater from a metal rolling mill industry | Bioconversion and absorption | 10%,  90% | [23] |
| 18 | *Bacillus megaterium* strain UM-123 | Bacteria | As | Soil in Miyazaki | Adsorption | 0.386 mg/g | [24] |
| 19 | *Serratia marcescens* (NCIM2919) | Bacteria | Cd2+ | Chemicals | Ureolysis-induced calcium carbonate precipitation | 96% | [25] |
| 98% |
| *Enterobacter cloacae* EMB19 (MTCC10649) |

| **Table 3:** **Genetically modified microorganisms for metal remediation through gene introduction/ alterations** | | | | | | | |
| --- | --- | --- | --- | --- | --- | --- | --- |
| **S. No** | **GM microorganism** | **Gene** | | **Metal** | **Output** | **Mechanism** | **Reference** |
| 1. | *Escherichia coli* | Four rice metallothionein (MT) isoforms as fusions with glutathione-S-transferase (GST) | OsMT1  OsMT2  OsMT3  OsMT4 | Hg | 20 nmol Hg2+/mg  13.7 nmol Hg2+/mg  10 nmol Hg2+/mg  7 nmol Hg2+/mg | Bioaccumulation | [26] |
| 2. | [*Pseudomonas*](https://www.sciencedirect.com/topics/earth-and-planetary-sciences/pseudomonas)aeruginosa | CadR, cadmium (Cd)-specific binding protein | | Cd | 131.9 μmol/g of Cd (II) | Adsorption | [27] |
| 3. | *Chlamydomonas reinhardtii* | *Arabidopsis thaliana*  transporter (AtHMA4) | | Cd  Zn  Cd (1mM)  Zn (1mM) | Two-fold increase  (wild ~0.5 x 109 atom cell-1; HMA4CT4 ~ 1.4 x 109 atom cell-1)  Two-three-fold increase  (wild ~ 2 x 109 atom cell-1 ; HMA4-FL2 ~5.3 x 109 atom cell-1)  Wild ~2.2 ug mg-1; HMA4-CT1~2.5 ug mg-1  Wild ~3 ug mg-1; HMA4-CT1~4.3 ug mg-1 | Accumulation  Immobilization | [28] |
| 4. | *Deinococcus radiodurans* | *flr-2*fluorine-resistant gene | | U | 90% of U(VI) was removed | Biosorption and bioreduction | [29] |
| 5. | [*Pichia*](https://www.sciencedirect.com/topics/pharmacology-toxicology-and-pharmaceutical-science/pichia)pastoris | Overexpressing  [cytochrome b5 reductase](https://www.sciencedirect.com/topics/medicine-and-dentistry/cytochrome-b5-reductase) enzyme | | Ag  Se | 163.90 mg/g  63.71 mg/g | Biosorption | [30] |
| 6. | *Escherichia coli* Jm109  *E. coli* MT2A | human metallothioneins MT2A and MT3 | | Cr(VI) | 17 mg/g | Adsorption | [31] |
| 22 mg/g |  |
| 7. | *Chlamydomonas reinhardtii* | *acr*3 gene from *Pteris vittata* | | As | 1.5 to 3 times more removal than the wild-type strain  (wild ~30ug/L; ACR3 ~110ug/L at 0.5 mg/L arsenate) | Accumulation | [32] |


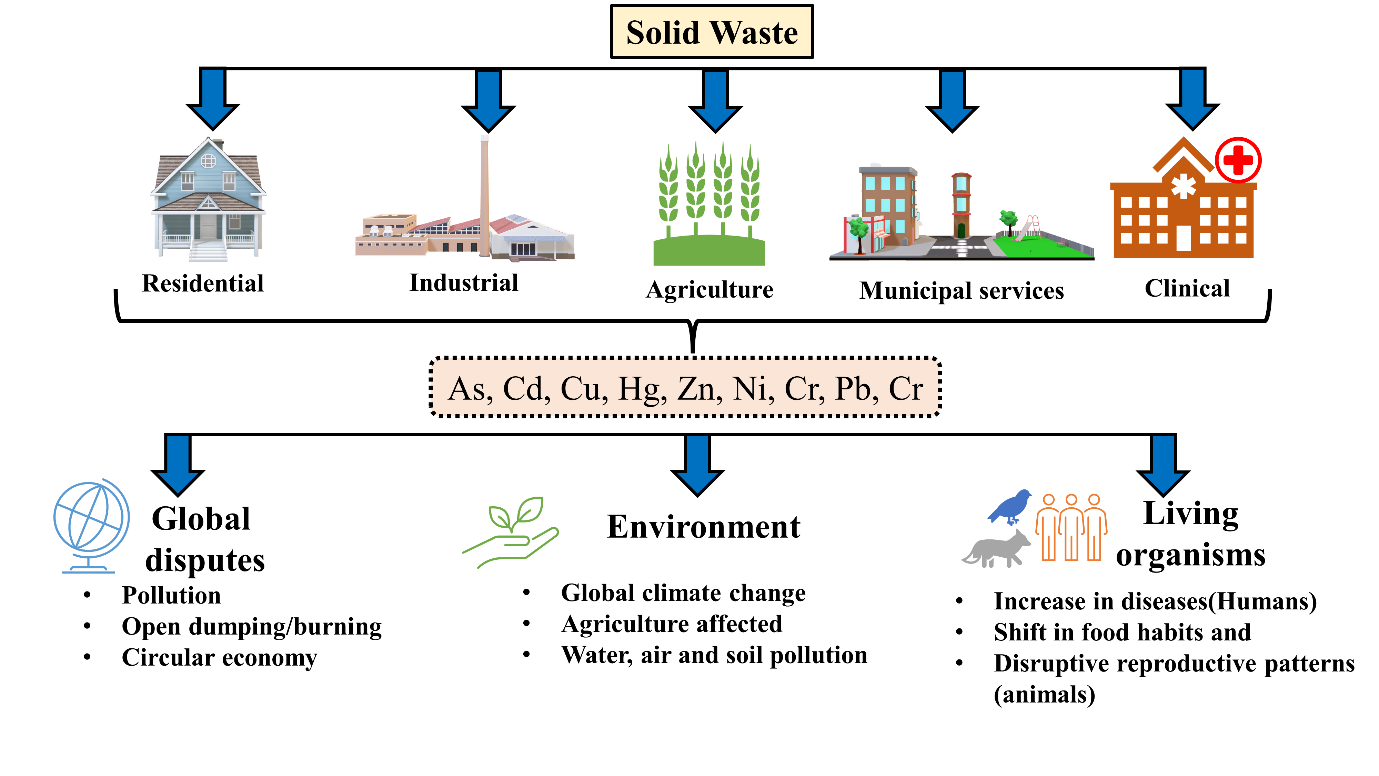


Supplementary Figure 1. Solid waste generation and their dumping leading to metal accumulation and the after-effects of metals on the environment and living organisms


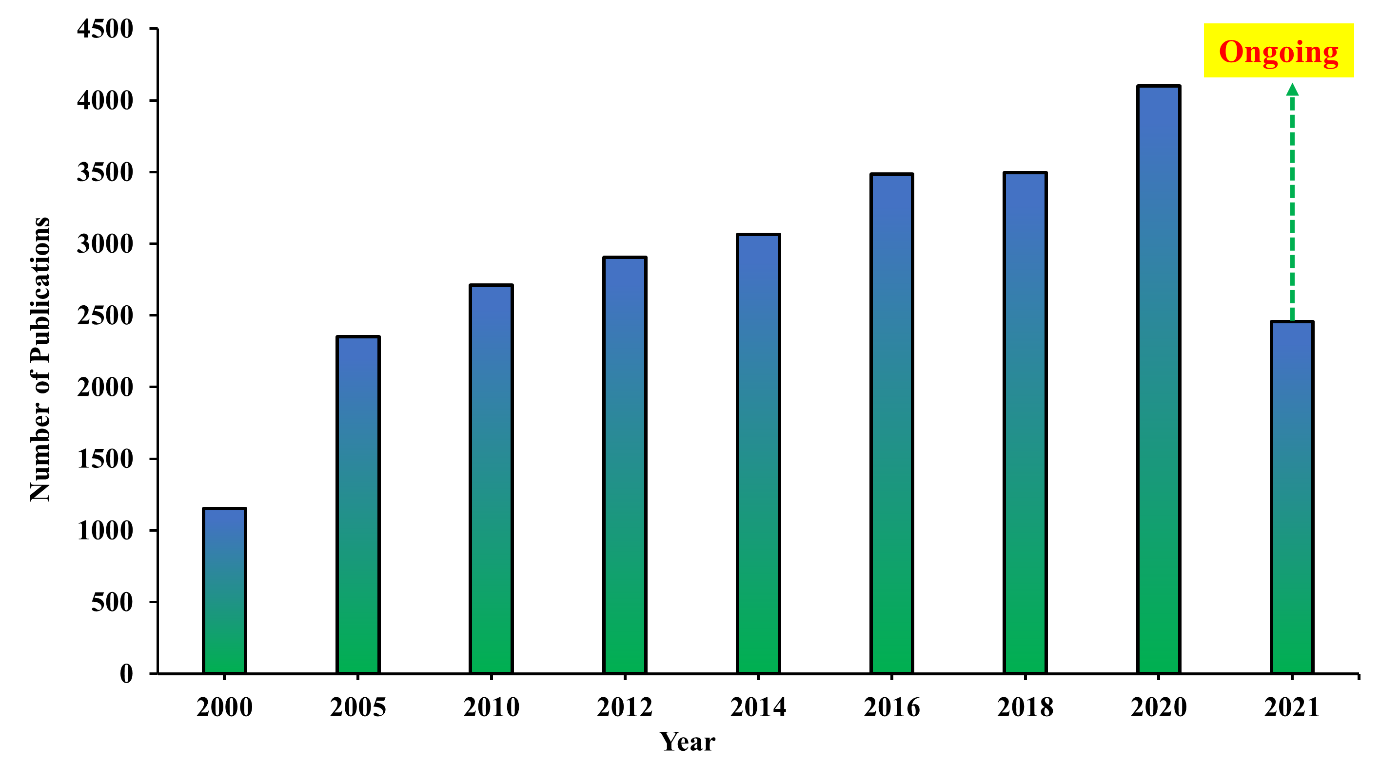


Supplementary Figure 2. Graphical representation of bioremediation papers (as of Aug 15, 2021) for the last two decades using the keyword: Bioremediation (Source PubMed)

**References**

[1] Tytła, M., 2019. Assessment of heavy metal pollution and potential ecological risk in sewage sludge from municipal wastewater treatment plant located in the most industrialized region in Poland—case study. Int. J. Environ. Res. Public Health, 2019;16:2430.

[2] Hossain MS, Santhanam A, Nik Norulaini NA, et al. Clinical solid waste management practices and its impact on human health and environment - A review. J Waste Manag. 2011;31:754–766.

[3] Holm O, Hansen E, Lassen C, et al. Heavy Metals in Waste European Commission. 2002. https://pdf4pro.com/view/heavy-metals-in-waste-european-commission-208d87.html

[4] Ishchenko VA. Environment contamination with heavy metals contained in waste. Environ. probl. 2018;3(1):21-24.

[5] Loehr RC. Hazardous solid waste from agriculture. Environ Health Perspect. 1978;27:261-273.

[6] Nacke H, Gonçalves AC, Schwantes D, et al. Availability of heavy metals (Cd, Pb, and Cr) in agriculture from commercial fertilizers. Arch Environ Contam Toxicol. 2013;64:537-544.

[7] Liu P, Zhang Y, Tang Q, et al. Bioremediation of metal-contaminated soils by microbially-induced carbonate precipitation and its effects on ecotoxicity and long-term stability. Biochem Eng J. 2021;166:107856.

[8] Hameed MSA. Continuous removal and recovery of lead by alginate beads, free and alginate-immobilized *Chlorella vulgaris*. Afr J Biotechnol. 2006;5:1819–1823.

[9] Liu S, Zhang F, Chen J, et al. Arsenic removal from contaminated soil via biovolatilization by genetically engineered bacteria under laboratory conditions. J Environ Sci. 2011;23:1544-1550.

[10] Wang C, He S, Zou Y, et al. Quantitative evaluation of in-situ bioremediation of compound pollution of oil and heavy metal in sediments from the Bohai Sea, China. Mar. Pollut. Bull. 2019;150:110787.

[11] Pereira ARB, Soares CRFS, da Silva JF, et al. Removal of trace element by isolates of *Aspergillus brasiliensis* EPAMIG 0084 and *Penicillium citrinum* EPAMIG 0086 in biofilters. Afr J Biotechnol. 2014;13;1684-5315

[12] Cui Z, Zhang X, Yang H, et al. Bioremediation of heavy metal pollution utilizing composite microbial agent of *Mucor circinelloides*, *Actinomucor* sp. and *Mortierella* sp. J Environ Chem Eng. 2017;5:3616–3621.

[13] Sanyal A, Rautaray D, Bansal V, et al. Heavy-metal remediation by a fungus as a means of production of lead and cadmium carbonate crystals. Langmuir, 2005;21:7220–7224.

[14] Singh S, Kumar V, Gupta P, et al. The synergy of mercury biosorption through *Brevundimonas* sp. IITISM22: Kinetics, isotherm, and thermodynamic modeling. J. Hazard. Mater. 2021;415:125653.

[15] Ramanathan T, Ting Y P. Erratum: Corrigendum to “Alkaline bioleaching of municipal solid waste incineration fly ash by autochthonous extremophiles”. Chemosphere. 2016;164: 54-61.

[16] Ghassa S, Farzanegan A, Gharabaghi M, et al. Novel bioleaching of waste lithium ion batteries by mixed moderate thermophilic microorganisms, using iron scrap as energy source and reducing agent. Hydrometallurgy. 2020;197:105465.

[17] Tong L, Zhao Q, Kamali AR, et al. Effect of graphite on copper bioleaching from waste printed circuit boards. Minerals, 2020;10:79.

[18] Henne A, Craw D, Vasconcelos P, et al. Bioleaching of waste material from the Salobo mine, Brazil: Recovery of refractory copper from Cu hosted in silicate minerals. Chem Geol. 2018;498:72–82.

[19] Tran CD, Lee JC, Pandey BD, et al. Bacterial cyanide generation in the presence of metal ions (Na+, Mg2+, Fe2+, Pb2+) and gold bioleaching from waste PCBs. J. Chem Eng Japan. 2011;44:692-700.

[20] Brandl H, Faramarzi MA. Microbe-metal-interactions for the biotechnological treatment of metal-containing solid waste. China Particuology. 2006;4:93–97.

[21] Richards RG, Mullins BJ. Using microalgae for combined lipid production and heavy metal removal from leachate. Ecol Modell 2013;249:59–67.

[22] Abd El-Hameed MM, Abuarab ME, Abdel Mottaleb S, et al. Comparative studies on growth and Pb(II) removal from aqueous solution by *Nostoc muscorum* and *Anabaena variabilis*. Ecotoxicol Environ Saf. 2018;165:637–644.

[23] Atoku DI, Ojekunle OZ, Taiwo AM, et al. Evaluating the Efficiency of *Nostoc commune*, *Oscillatoria limosa* and *Chlorella vulgaris* in a phycoremediation of heavy metals contaminated industrial wastewater. Sci Afr.2021;e00817.

[24] Miyatake M, Hayashi S. Characteristics of arsenic removal from aqueous solution by *Bacillus megaterium* strain UM-123. Environ Biotechnol. 2009;9:123–129.

[25] Bhattacharya A, Naik SN, Khare SK. Harnessing the bio-mineralization ability of urease producing *Serratia marcescens* and *Enterobacter cloacae* EMB19 for remediation of heavy metal cadmium (II). J Environ Manage. 2018;215:143–152.

[26] Shahpiri A, Mohammadzadeh A. Mercury removal by engineered *Escherichia coli* cells expressing different rice metallothionein isoforms. Ann. Microbiol. 2018;68:145-152.

[27] Tang X, Zeng G, Fan C, et al. Chromosomal expression of CadR on Pseudomonas aeruginosa for the removal of Cd (II) from aqueous solutions. Sci Total Environ, 2018;636;1355-1361.

[28] Ibuot A, Webster RE, Williams LE, et al. Increased metal tolerance and bioaccumulation of zinc and cadmium in *Chlamydomonas reinhardtii* expressing a AtHMA4 C‐terminal domain protein. Biotechnol Bioeng. 2020;117:2996-3005.

[29] Luo J, Zhu Q, Li S, et al. Construction of Deino-flr-2 radiation-tolerant genetically engineered strain containing flr-2 fluoride-tolerant gene and its enrichment behavior for U(VI). J Radioanal Nucl Chem. 2021;1-14.

[30] Elahian F, Reiisi S, Shahidi A, Mirzaei SA. High-throughput bioaccumulation, biotransformation, and production of silver and selenium nanoparticles using genetically engineered *Pichia pastoris*. Nanomedicine Nanomed: Nanotechnol biol med. 2017;13:853-861.

[31] Akkurt Ş, Oğuz M, Uçkun AA. Bioreduction and bioremoval of hexavalent chromium by genetically engineered strains (*Escherichia Coli* MT2A and *Escherichia Coli* MT3). Research Square. 2021:1-5.

[32] Ramírez-Rodríguez AE, Bañuelos-Hernández B, García-Soto MJ, et al. Arsenic removal using *Chlamydomonas reinhardtii* modified with the gene acr3 and enhancement of its performance by decreasing phosphate in the growing media. Int. J. Phytoremediation 2019;21:617-623.
